# Supplementary material for: Pollutant soot of diesel engine exhaust transformed to carbon dots for multicoloured imaging of E. coli and sensing cholesterol
Source: Royal Society of Chemistry journal article supplement (doi:10.1039/c4ra03720k), 2014-07-10
Supplement: c4ra03720k1.pdf [file c4ra03720k1.pdf]

## Electronic supplementary information

### **Pollutant soot of diesel engine exhaust transformed to carbon dots for multicoloured imaging of *E-coli* and sensing cholesterol**

Kumud Malika Tripathi<sup>a</sup>, Amit Kumar Sonker<sup>b</sup>, Sumit Kumar Sonkar<sup>\*c</sup> and Sabyasachi Sarkar<sup>\*d</sup>

<sup>a</sup> Department of Chemistry, Indian Institute of Technology Kanpur, Kanpur-208016, India.

<sup>b</sup> Department of Materials Science & Engineering, Indian Institute of Technology Kanpur, Kanpur-208016, India.

<sup>c</sup> Department of Chemistry, Malaviya National Institute of Technology, Jaipur, Jaipur-302017, India, E-mail: [sksonkar.chy@mnit.ac.in](mailto:sksonkar.chy@mnit.ac.in)

<sup>d</sup> Department of Chemistry, Indian Institute of Engineering Science and Technology, Shibpur, Howrah-711103, India, E-mail: [abya@iitk.ac.in](mailto:abya@iitk.ac.in)

#### **(a) Before oxidative treatment**

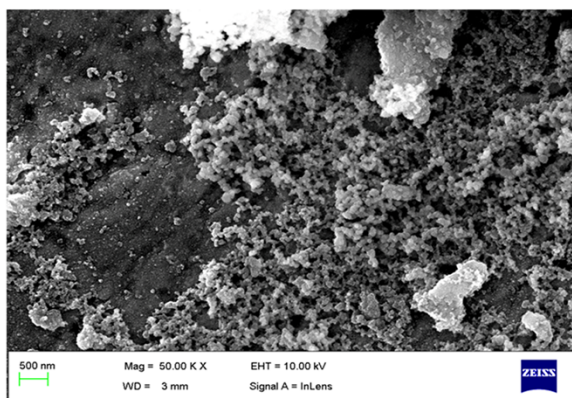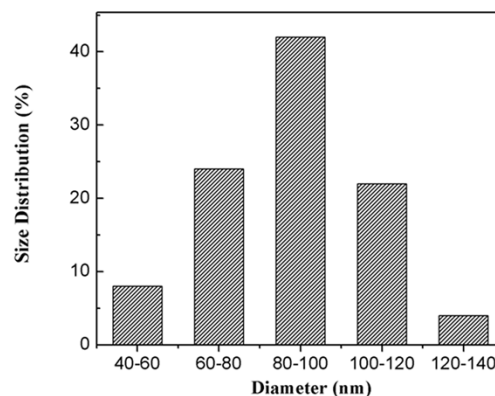

#### **(b) After oxidative treatment**

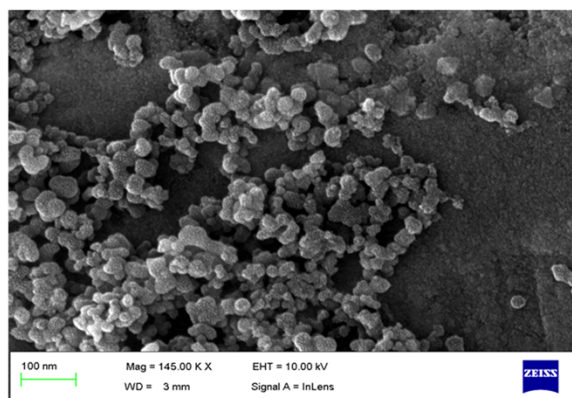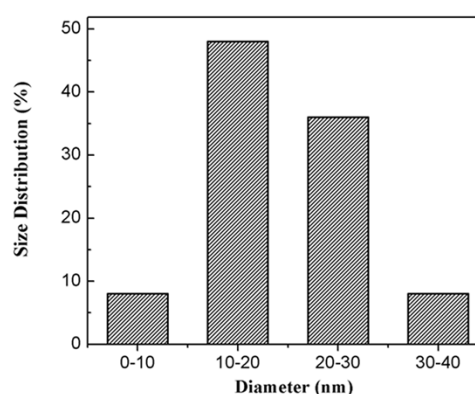

Fig. S1- FESEM image of (a) untreated soot (before oxidative treatment); (b) after oxidative treatment, along with their corresponding size distribution histograms of CDs.
